# Supplementary material for: Combination of computed tomography angiography with coronary artery calcium score for improved diagnosis of coronary artery disease: a collaborative meta-analysis of stable chest pain patients referred for invasive coronary angiography
Source: Springer Nature journal article supplement (doi:10.1007/s00330-023-10223-z), 2023-10-13
Supplement: MOESM1 [file 26177394]

**Combination of computed tomography angiography with coronary artery calcium score for improved diagnosis of coronary artery disease: a collaborative meta-analysis of stable chest pain patients referred for invasive coronary angiography**

**Electronic Supplementary Material**

## APPENDIX RESULTS

Appendix Figure 1: Flowchart

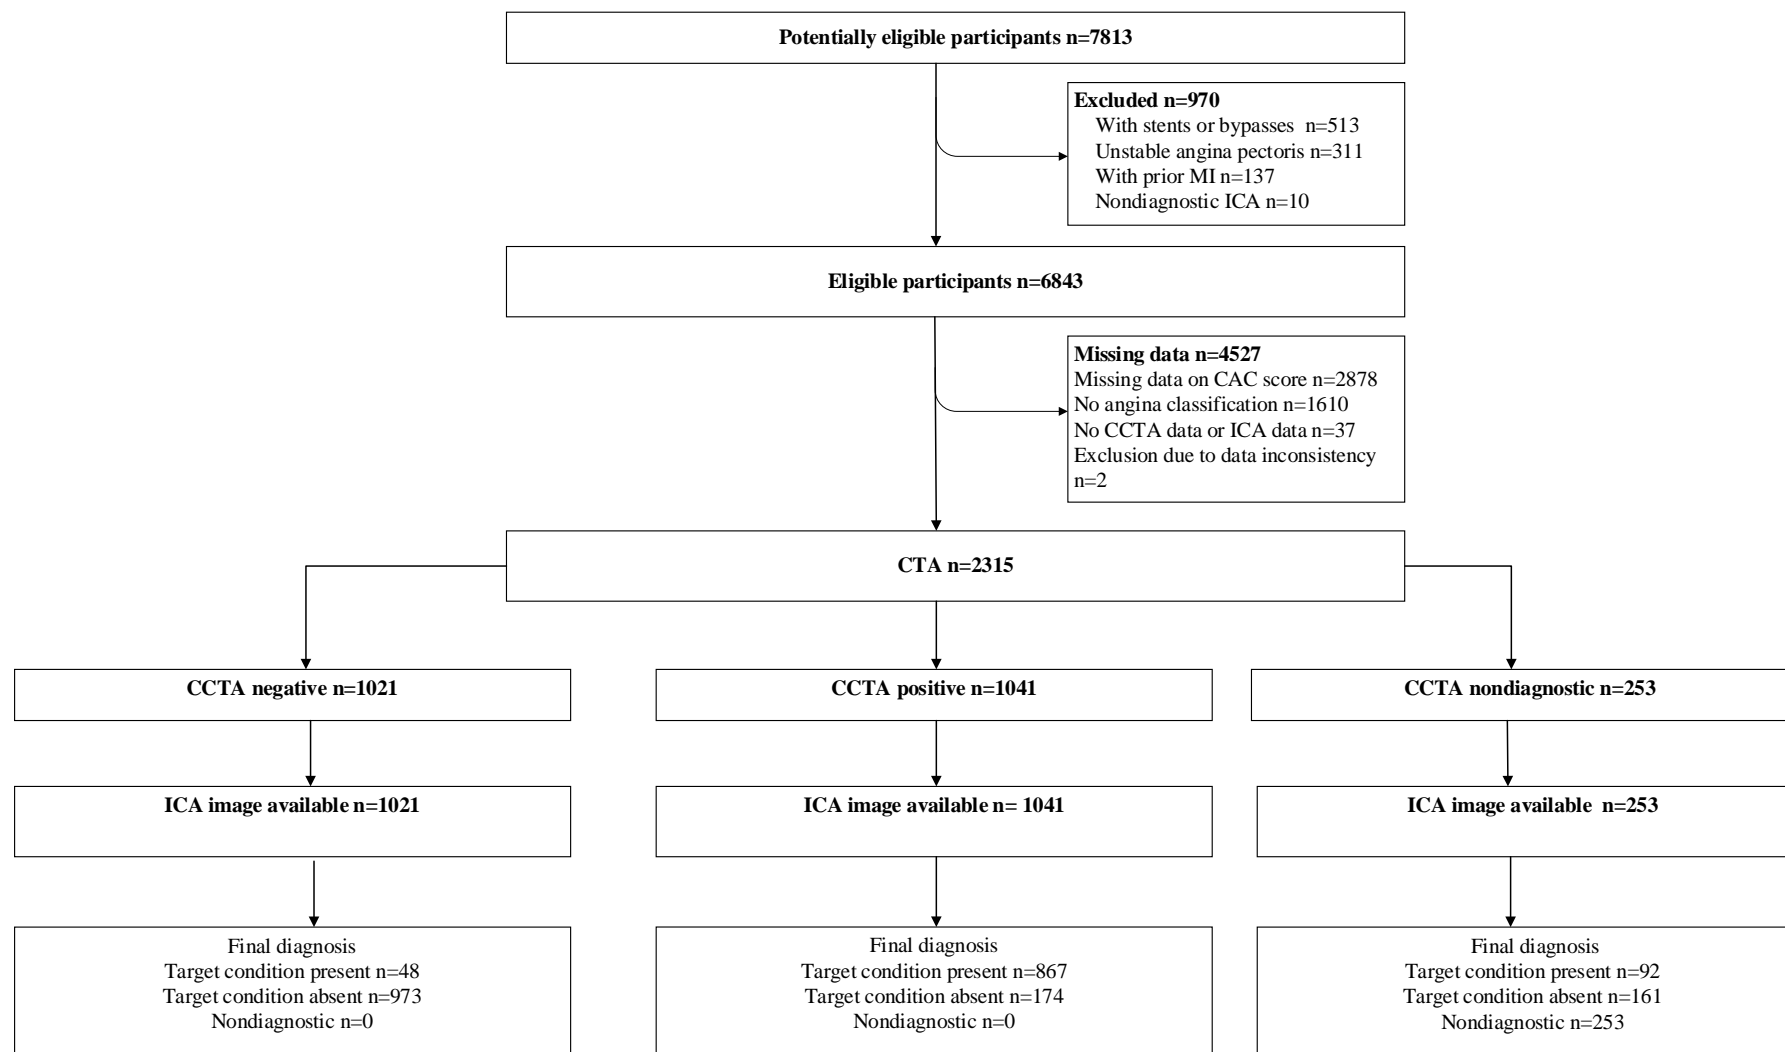

Overall, 2315 patients with complete data on age, gender, chest pain type, and CAC score from 29 studies were included from the CoMe-CCT dataset (7813 patients from 76 studies)

**Appendix Figure 2: Calibration plot of the CAC-plus-CTA model and CTA-alone model**

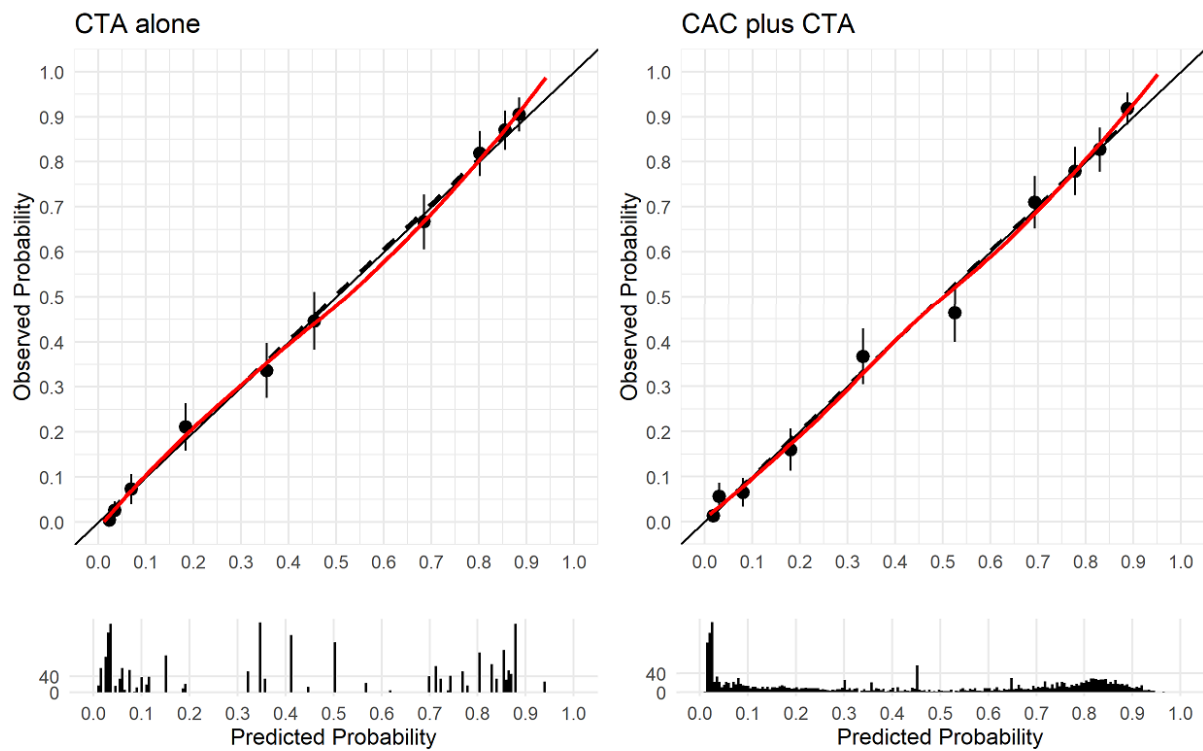

**Appendix Figure 3: Forest plot of the CTA-alone model.**

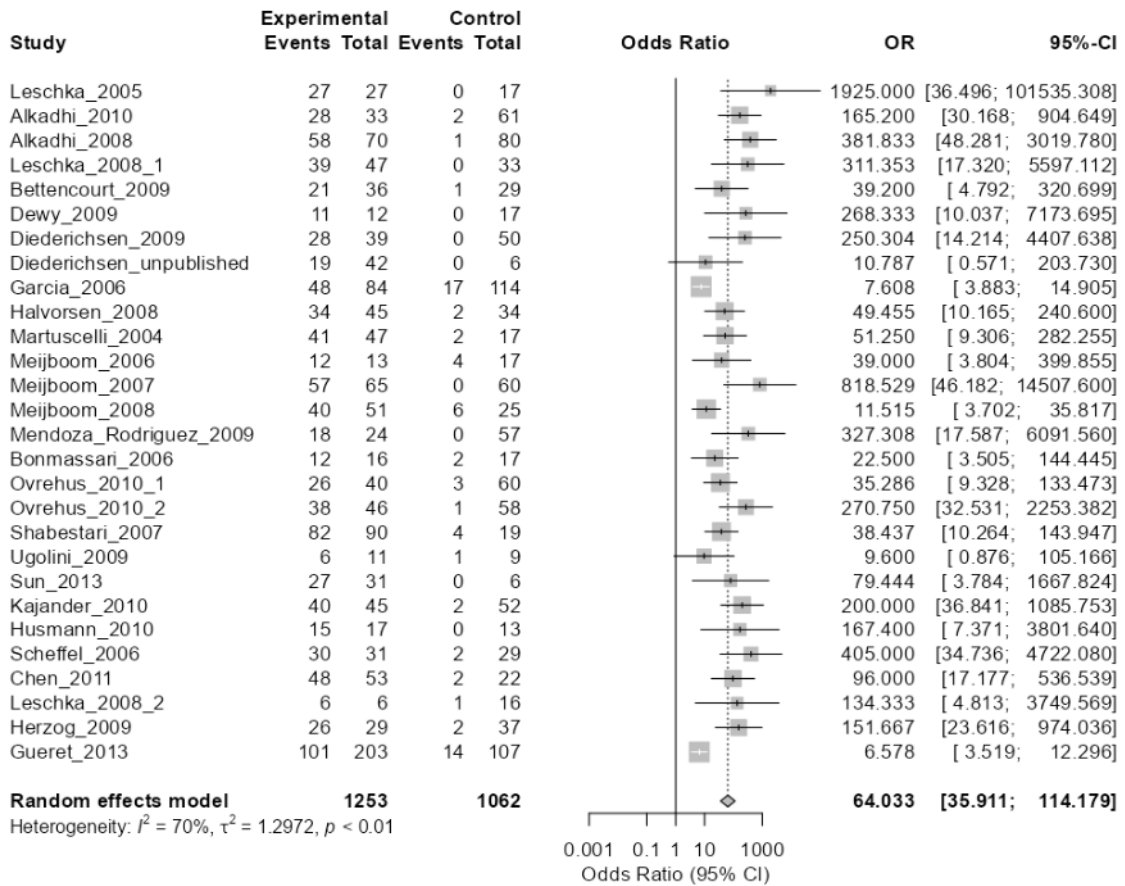

**Appendix Figure 4: Forest plot of the CAC-plus-CTA model.**

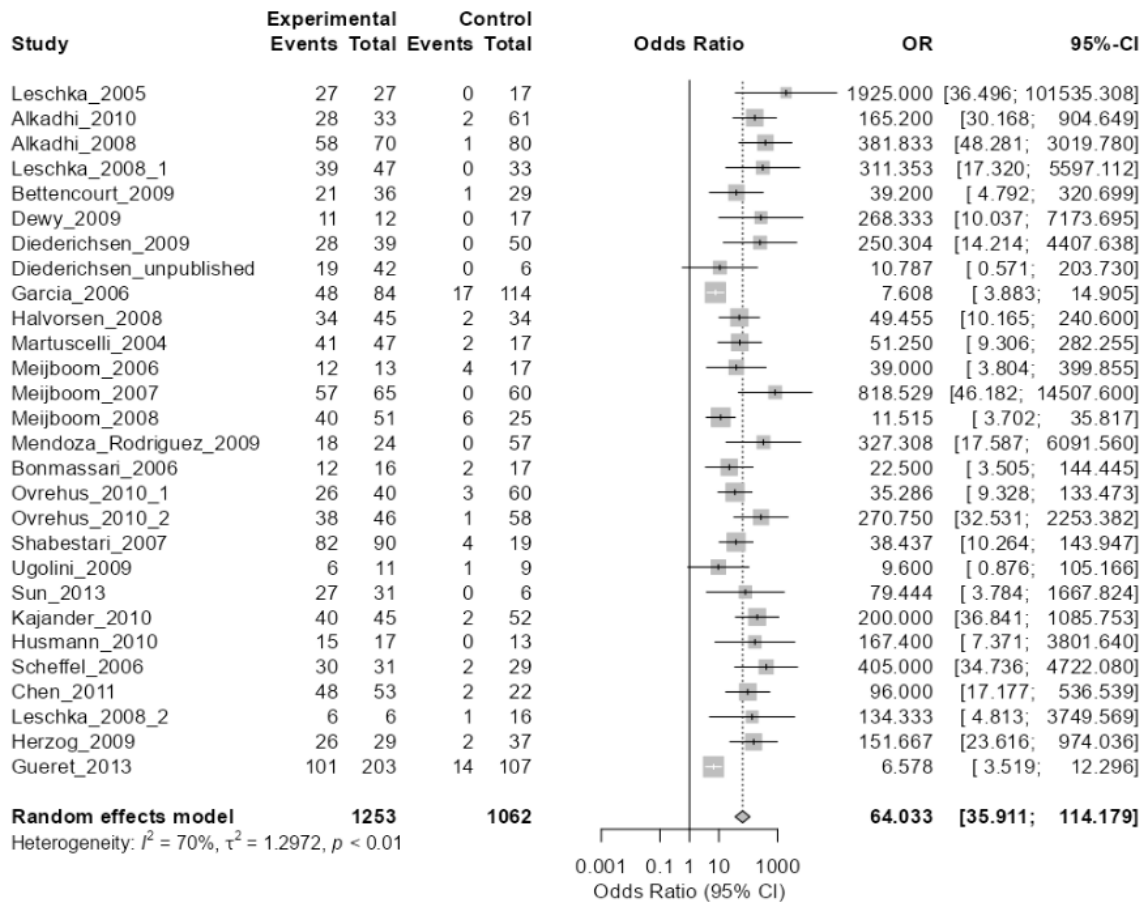

| <b>Appendix Table 1. Internal validation for CAC-plus-CTA model and CTA-alone model</b>                                                                                                                                                                                                                                                                                                                                                                                                                                                                                                                                                                                         |                       |                         |                        |                 |                            |
|---------------------------------------------------------------------------------------------------------------------------------------------------------------------------------------------------------------------------------------------------------------------------------------------------------------------------------------------------------------------------------------------------------------------------------------------------------------------------------------------------------------------------------------------------------------------------------------------------------------------------------------------------------------------------------|-----------------------|-------------------------|------------------------|-----------------|----------------------------|
| <b>Performance Measure</b>                                                                                                                                                                                                                                                                                                                                                                                                                                                                                                                                                                                                                                                      | <b>Original Model</b> | <b>Bootstrap Sample</b> | <b>Original Sample</b> | <b>Optimism</b> | <b>Bootstrap corrected</b> |
| <b>CTA-alone model</b>                                                                                                                                                                                                                                                                                                                                                                                                                                                                                                                                                                                                                                                          |                       |                         |                        |                 |                            |
| AUC <sup>a</sup>                                                                                                                                                                                                                                                                                                                                                                                                                                                                                                                                                                                                                                                                | 80.2%                 | 80.4%                   | 80.4%                  | 0.0000          | 80.2%                      |
| Brier Score <sup>b</sup>                                                                                                                                                                                                                                                                                                                                                                                                                                                                                                                                                                                                                                                        | 0.149                 | 0.149                   | 0.149                  | 0.0002          | 0.149                      |
| Scaled Brier Score <sup>c</sup>                                                                                                                                                                                                                                                                                                                                                                                                                                                                                                                                                                                                                                                 | 0.4                   | 0.4                     | 0.4                    | 0.00            | 0.4                        |
| Discrimination Slope <sup>d</sup>                                                                                                                                                                                                                                                                                                                                                                                                                                                                                                                                                                                                                                               | 0.400                 | 0.397                   | 0.396                  | 0.000           | 0.399                      |
| Calibration Slope <sup>e</sup>                                                                                                                                                                                                                                                                                                                                                                                                                                                                                                                                                                                                                                                  | 0.994                 | 0.982                   | 0.994                  | -0.0117         | 1.006                      |
| <b>CAC-plus-CTA model</b>                                                                                                                                                                                                                                                                                                                                                                                                                                                                                                                                                                                                                                                       |                       |                         |                        |                 |                            |
| AUC <sup>a</sup>                                                                                                                                                                                                                                                                                                                                                                                                                                                                                                                                                                                                                                                                | 87.2%                 | 87.2%                   | 87.1%                  | -0.00002        | 87.2%                      |
| Brier Score <sup>b</sup>                                                                                                                                                                                                                                                                                                                                                                                                                                                                                                                                                                                                                                                        | 0.132                 | 0.132                   | 0.132                  | 0.000           | 0.132                      |
| Scaled Brier Score <sup>c</sup>                                                                                                                                                                                                                                                                                                                                                                                                                                                                                                                                                                                                                                                 | 0.47                  | 0.47                    | 0.47                   | 0.0001          | 0.47                       |
| Discrimination Slope <sup>d</sup>                                                                                                                                                                                                                                                                                                                                                                                                                                                                                                                                                                                                                                               | 0.455                 | 0.454                   | 0.455                  | -0.0013         | 0.456                      |
| Calibration Slope <sup>e</sup>                                                                                                                                                                                                                                                                                                                                                                                                                                                                                                                                                                                                                                                  | 0.984                 | 0.971                   | 0.985                  | -0.0136         | 0.998                      |
| <sup>a</sup> AUC: area under the receiver-operating-characteristic curve as a concordance statistics<br><sup>b</sup> Brier score: measuring the accuracy of probabilistic predictions by quantifying the prediction error. A perfect model has a zero Brier score<br><sup>c</sup> Scaled Brier score: is scaled by its maximum score and accounts for the outcome (CAD) prevalence. A perfect model has a score of 1<br><sup>d</sup> Discrimination slope: is the difference in mean of predicted probabilities between disease (CAD) and no disease (no CAD)<br><sup>e</sup> Calibration slope: measures the agreement between the actual outcome and predicted probabilities. |                       |                         |                        |                 |                            |

| <b>Appendix Table 2. Diagnostic Performance of CAC-plus-CTA and CTA-alone model</b> |                                 |                                 |                 |
|-------------------------------------------------------------------------------------|---------------------------------|---------------------------------|-----------------|
|                                                                                     | <b>CAC plus CTA</b>             | <b>CTA alone</b>                | <b>p-value*</b> |
|                                                                                     | <i>n/total n (% [95% CI*])</i>  | <i>n/total n (% [95% CI*])</i>  |                 |
| Diagnostic accuracy                                                                 | 1895 / 2315 (81.9% [81.7-82.0]) | 1840 / 2315 (79.5% [79.4-79.7]) | <0.0001         |
| Sensitivity                                                                         | 846/1007 (83.9% [81.6-86.2])    | 867 / 1007 (86.1% [84.0-88.2])  | <0.021          |
| Specificity                                                                         | 1050 / 1308 (80.3% [78.1-82.4]) | 973/1308 (74.4% [72.0-86.8])    | <0.0001         |
| Positive predictive value                                                           | 846 / 1103 (76.6% [74.1-79.1])  | 867/1202 (72.1% [69.6-74.7])    | <0.0001         |
| Negative predictive value                                                           | 1050/ 1212 (86.6% [84.7-88.5])  | 973/1113 (87.4% [85.5-89.4])    | 0.257           |

**Appendix Table 3. Estimates of the mixed-effect logistic regression model of CTA-alone and CAC-plus-CTA models (n=2315)**

|                                                                                                                                                                                                                                                                                                                                                               | Estimate (S.E.) | p value | Odds Ratio (95% CI)    |
|---------------------------------------------------------------------------------------------------------------------------------------------------------------------------------------------------------------------------------------------------------------------------------------------------------------------------------------------------------------|-----------------|---------|------------------------|
| <b>CTA-alone model</b>                                                                                                                                                                                                                                                                                                                                        |                 |         |                        |
| CTA                                                                                                                                                                                                                                                                                                                                                           | 2.91 (0.116)    | < 0.001 | 18.3 (14.63 to 23.03)  |
| <b>Model constant</b>                                                                                                                                                                                                                                                                                                                                         | -1.897 (0.124)  | —       | —                      |
| <b>Random intercept (<math>\tau^2</math>)<sup>b</sup></b>                                                                                                                                                                                                                                                                                                     | 0.167(0.411)    |         |                        |
| BIC                                                                                                                                                                                                                                                                                                                                                           | 2256.9          |         |                        |
| logLik                                                                                                                                                                                                                                                                                                                                                        | -1116.8         |         |                        |
| <b>CAC-plus-CTA model</b>                                                                                                                                                                                                                                                                                                                                     |                 |         |                        |
| Log CAC score <sup>c</sup>                                                                                                                                                                                                                                                                                                                                    | 0.362 (0.026)   | < 0.001 | 1.44 (1.37 to 1.51)    |
| CTA                                                                                                                                                                                                                                                                                                                                                           | 2.67 (0.123)    | < 0.001 | 14.51 (11.42 to 18.54) |
| <b>Model constant</b>                                                                                                                                                                                                                                                                                                                                         | -3.257 (0.183)  | —       | —                      |
| <b>Random intercept (<math>\tau^2</math>)<sup>b</sup></b>                                                                                                                                                                                                                                                                                                     | 0.272 (0.522)   |         |                        |
| BIC                                                                                                                                                                                                                                                                                                                                                           | 2028.4          |         |                        |
| logLik                                                                                                                                                                                                                                                                                                                                                        | -998.7          |         |                        |
| BIC: Bayesian information criterion                                                                                                                                                                                                                                                                                                                           |                 |         |                        |
| <sup>a</sup> Typical angina is defined as: retrosternal chest discomfort, precipitation by exertion, and prompt relief (within 30 s-10 min) by rest or nitroglycerin. Patients in whom two, one, or none of these three criteria were found were classified as having atypical angina, nonanginal chest discomfort, and other chest discomfort, respectively. |                 |         |                        |
| <sup>b</sup> Variance component estimate ( $\tau^2$ ) for random intercept                                                                                                                                                                                                                                                                                    |                 |         |                        |
| <sup>c</sup> Log CAC score was used to overcome its nonnormality.                                                                                                                                                                                                                                                                                             |                 |         |                        |
| CAC cut-off value = $e^{(\beta_{CTA}/\beta_{\log CAC})} = 1715$                                                                                                                                                                                                                                                                                               |                 |         |                        |

**Appendix Table 4. Likelihood ratio test comparing the CTA-alone and CAC-plus-CTA models (n=2315)**

|                     | BIC    | logLik  | Deviance | X <sup>2</sup> | p value |
|---------------------|--------|---------|----------|----------------|---------|
| <b>CTA alone</b>    | 2256.9 | -1116.8 | 2233.7   |                |         |
| <b>CAC plus CTA</b> | 2028.4 | -998.7  | 1997.4   | 236.25         | <0.001  |
